# Supplementary material for: A novel large Ni-azido circle with tridentate (NNO) Schiff base co-ligands: hexagonal structure and ferromagnetic properties
Source: Royal Society of Chemistry journal article supplement (doi:10.1039/b9nj00646j), 2009-12-11
Supplement: b9nj00646j.pdf [file b9nj00646j.pdf]

## *Supporting Information*

# **A novel large Ni-azido circle with co-ligands–tridentate (NNO) Schiff bases: hexagonal structure and ferromagnetic property**

**Baiwang Sun, \*<sup>[a]</sup> Xiaodan Chen,<sup>[a]</sup> Zhongshu Li,<sup>[a]</sup> Lei Zhang,<sup>[b]</sup> and Qihua Zhao<sup>[b]</sup>**

<sup>a</sup> *Ordered Matter Science Research Center, Department of Chemistry and Chemical Engineering, Southeast University, Nanjing 210096 P. R. China; Email: chmsunbw@seu.edu.cn, Fax: +86 025 52090614; Tel: +86 025 52090614*

<sup>b</sup> *Department of Chemistry Key Laboratory of Medicinal Chemistry for Natural Resource Ministry of Education, Yunnan University, Kunming 650091, P. R. China; Email: qzhao@ynu.edu.cn;*

Content:

1. **Fig.s1** Perspective view of complex **1**. All hydrogen atoms except H2A, H2C, H4A, H4C, H6A, H6B and solvent water molecules are omitted for clarity. Hydrogen bonds are showed as dash line.
2. **Fig. s2**. Plot of the reduced magnetization for **1** ( $M/N\beta$ ) vs  $H$  at 1.9K
3. **Fig. s3**. Plot of temperature dependance of the in-phase,  $\chi'_M$  and out-of-phase  $\chi''_M$  ac magnetic susceptibilities.
4. **Fig. s4**. The TG-DSC curves of complex **1**.H<sub>2</sub>O precursor under a nitrogen atomsphere with a heating rate of 10 /min without the ball-milled precursor.
5. **Table s1**. Hydrogen bonds of complex **1**

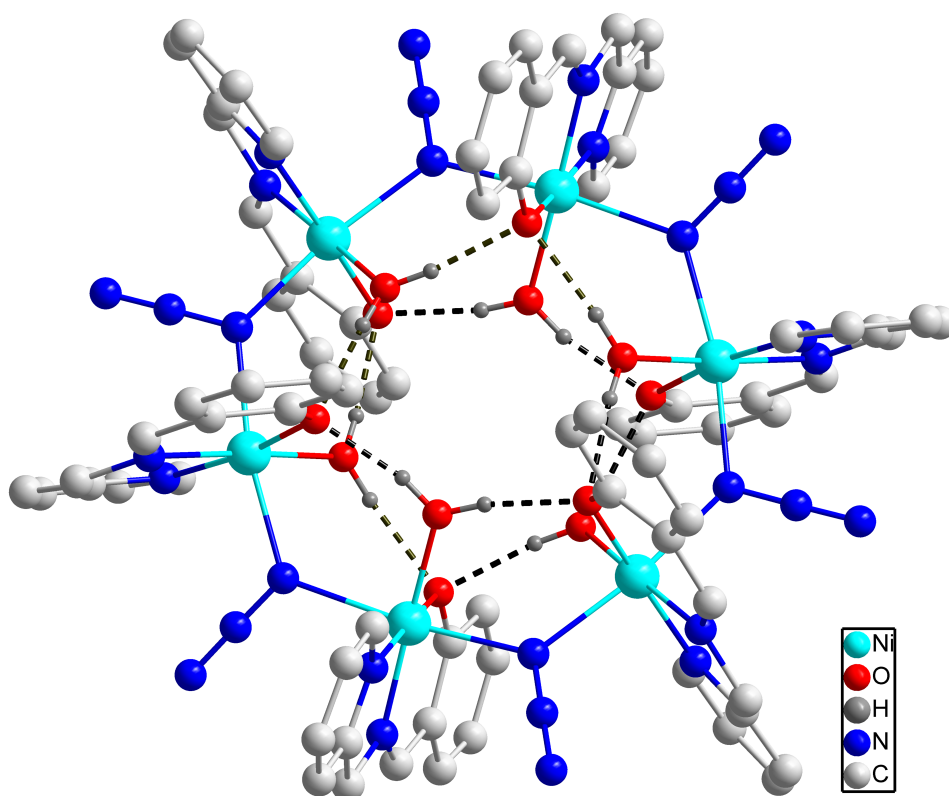

**Fig.s1** Perspective view of complex 1. All hydrogen atoms excepted H2A, H2C, H4A, H4C, H6A, H6B and solvent water molecules are omitted for clarity. Hydrogen bonds are showed as dash line.

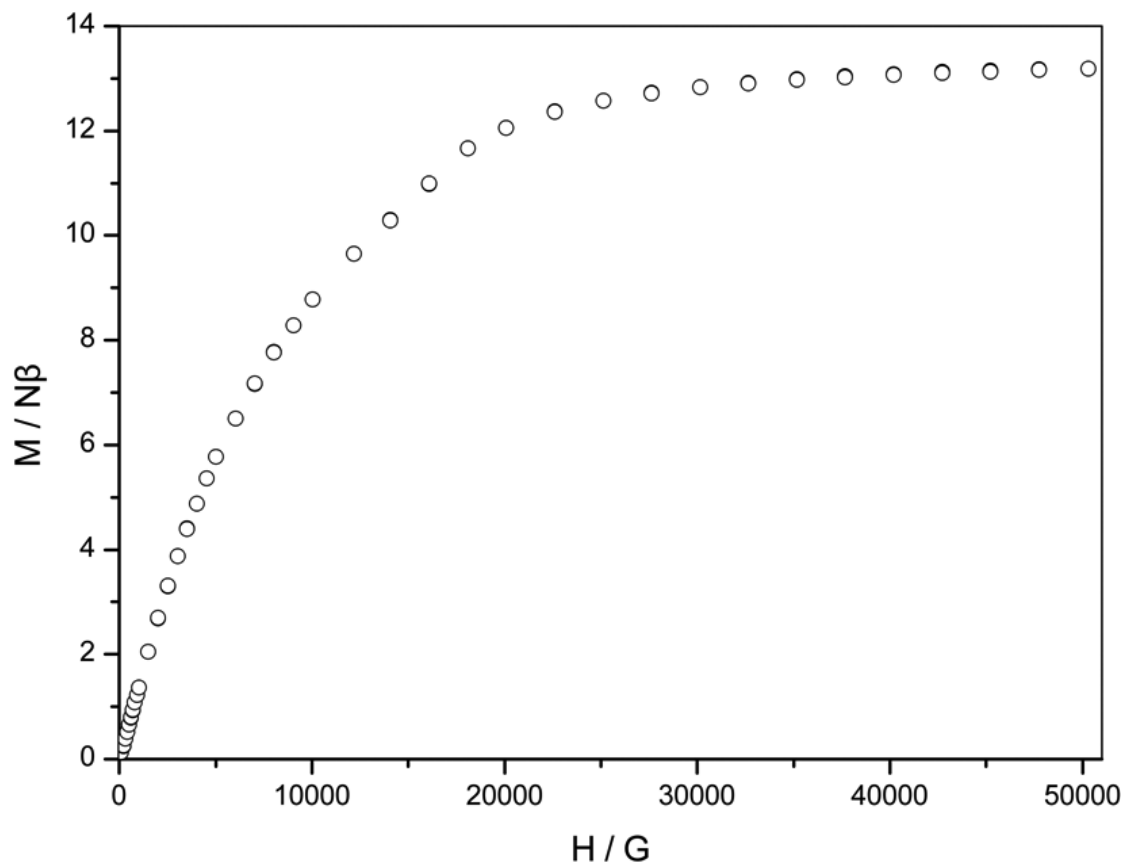

**Fig. s2.** Plot of the reduced magnetization for **1** ( $M/N\beta$ ) vs  $H$  at 1.9K.

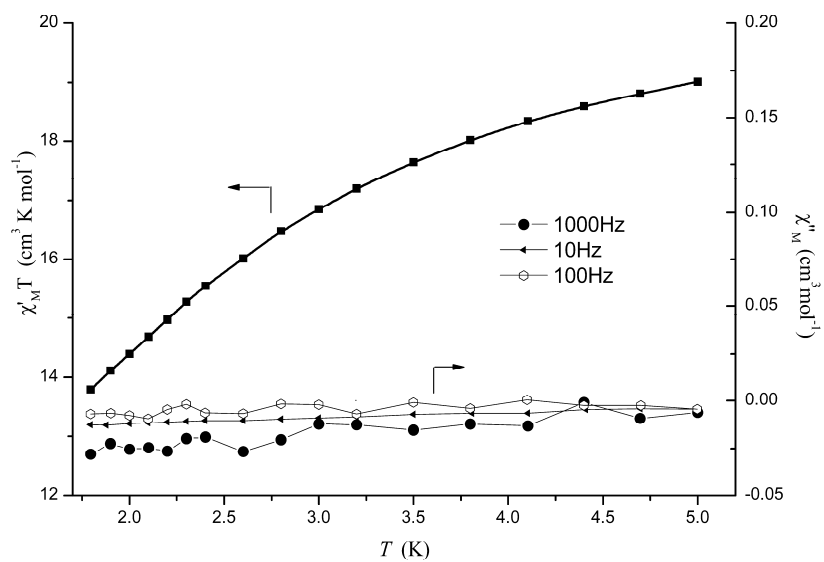

**Fig. s3.** Plot of temperature dependence of the in-phase  $\chi'_M T$ - $T$  and out-of-phase  $\chi''_M T$  ac magnetic susceptibilities.

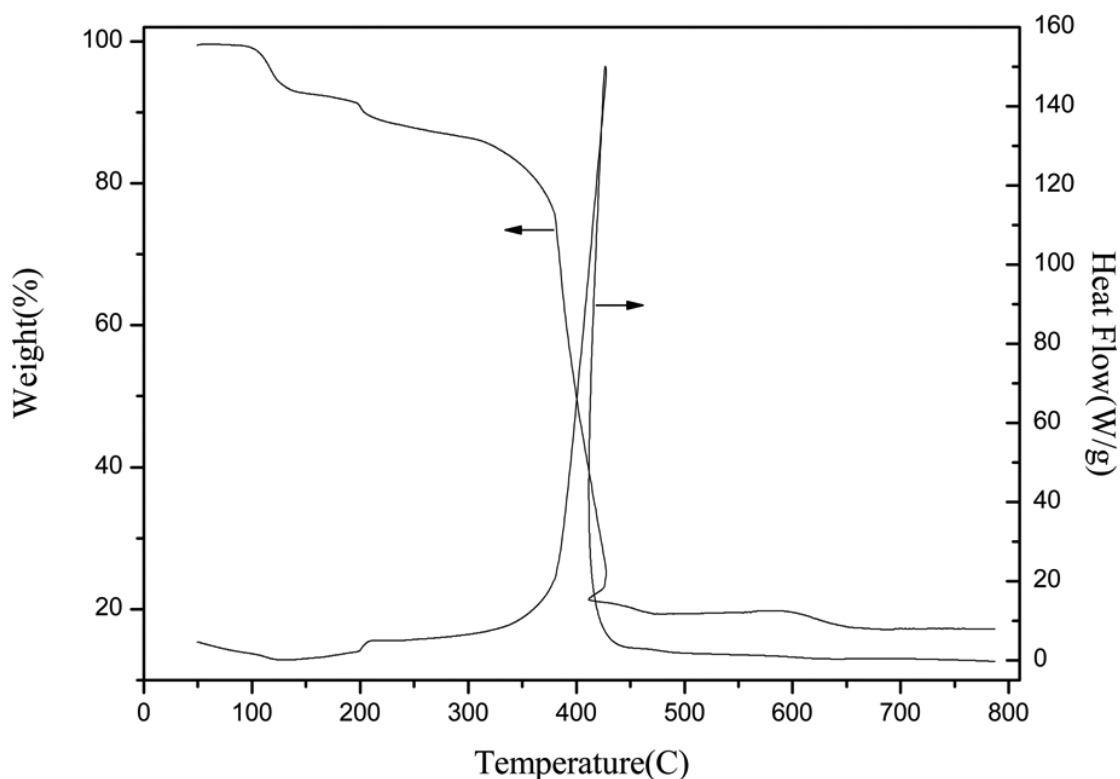

**Fig. s4.** The TG-DSC curves of complex **1.H<sub>2</sub>O** precursor under a nitrogen atmosphere with a heating rate of 10 /min without the ball-milled precursor.

The result of TG-DSC indicated that it lost the H<sub>2</sub>O molecular outer the ring above 99.6°, with a mass loss of approximately 1.01% (calculated loss of 0.9% ), and with another mass loss about 5.78% from 99.6° to 141.7°, which should be the six coordinated water( calculated loss of 5.41% ). Above 141.7°, it lost the six azido molecules, the mass loss of about 12.57%(calculated loss of 12.62% ), further, it lost mass of 63.11% above 355.6°, what means the six Schiff bases were gone(calculated loss of 63.44%). The residual is about 17.53%, which coincide with the Nickel dioxide (NiO, calculated of 17.63%).

**Table s1.** Hydrogen bonds of complex 1

| D-H...A             | d(D-H) | d(H...A) | d(D...A) | < (DHA) |
|---------------------|--------|----------|----------|---------|
| O(6)-H(6A)...O(3)   | 0.85   | 1.83     | 2.671(4) | 170.2   |
| O(2)-H(2A)...O(3)   | 0.85   | 1.95     | 2.779(4) | 166.3   |
| O(4)-H(4A)...O(1)   | 0.85   | 1.78     | 2.610(4) | 166.5   |
| O(4)-H(4C)...O(5)   | 0.85   | 1.85     | 2.689(4) | 170.6   |
| O(6)-H(6B)...O(1)#1 | 0.85   | 1.85     | 2.685(4) | 166.4   |
| O(2)-H(2C)...O(5)#1 | 0.85   | 1.85     | 2.679(4) | 165.9   |

Symmetry transformations used to generate equivalent atoms: #1 1-x, -y, 1-z
